# Supplementary material for: Development and Validation of a High-Throughput Mass Spectrometry Based Urine Metabolomic Test for the Detection of Colonic Adenomatous Polyps
Source: PubMed Central journal article supplement (PMC5618317; doi:10.3390/metabo7030032), 2017-06-22
Supplement: metabolites-07-00032-s001.pdf [file metabolites-07-00032-s001.pdf]

## Supplementary Materials: Development and validation of a high-throughput mass spectrometry based urine metabolomic test for colorectal cancer screening

Lu Deng, David Chang, Rae R. Foshaug, Roman Eisner, Victor K. Tso, David S. Wishart, Richard N. Fedorak

**Table S1.** Optimized MS parameters for each compound. MRM pair 1 is used for quantitation and MRM pair 2 is for qualification.

| Compound                       | Polarity | Q1    | Q3    | DP  | CE  | CXP |
|--------------------------------|----------|-------|-------|-----|-----|-----|
| Succinic acid 1                | -        | 117.0 | 73.0  | -40 | -16 | -1  |
| Succinic acid 2                | -        | 117.0 | 55.1  | -40 | -22 | -7  |
| Succinic acid-D4               | -        | 121.0 | 77.0  | -40 | -16 | -1  |
| Ascorbic acid 1                | -        | 175.0 | 114.9 | -45 | -18 | -7  |
| Ascorbic acid 2                | -        | 175.0 | 86.8  | -45 | -28 | -13 |
| Ascorbic acid- <sup>13</sup> C | -        | 176.0 | 116.0 | -45 | -18 | -7  |
| Carnitine 1                    | +        | 162.1 | 103.1 | 51  | 25  | 6   |
| Carnitine 2                    | +        | 162.1 | 43.2  | 51  | 47  | 6   |
| Carnitine-D9                   | +        | 171.0 | 103.0 | 51  | 25  | 6   |

**Table S2.** Extraction recoveries and accuracies for each metabolite.

| Metabolite    | Recovery (%) <sup>a</sup> | Accuracy (%) <sup>b</sup> |
|---------------|---------------------------|---------------------------|
| Succinic acid | 101.0                     | 110.2                     |
| Ascorbic acid | 93.8                      | 98.7                      |
| Carnitine     | 93.1                      | 102.7                     |

a.  $\text{Recovery (\%)} = (\text{Response (spiked sample)}) / (\text{Response (post-spiked sample)}) \times 100$

b.  $\text{Accuracy (\%)} = (\text{spiked sample} - \text{upspiked sample}) / (\text{spiked amount}) \times 100$

**Table S3.** CV% of QC samples for each metabolite within each plate.

|                | <b>Succinic acid</b>                          |       | <b>Ascorbic acid</b>                          |       | <b>Carnitine</b>                              |       |
|----------------|-----------------------------------------------|-------|-----------------------------------------------|-------|-----------------------------------------------|-------|
|                | Average<br>concentration<br>( $\mu\text{M}$ ) | CV%   | Average<br>concentration<br>( $\mu\text{M}$ ) | CV%   | Average<br>concentration<br>( $\mu\text{M}$ ) | CV%   |
| <b>Kit 1</b>   | 21.1                                          | 14.7% | 125.2                                         | 8.6%  | 45.5                                          | 9.8%  |
| <b>Kit 2</b>   | 23.0                                          | 5.9%  | 121.8                                         | 8.3%  | 49.2                                          | 10.4% |
| <b>Kit 3</b>   | 25.7                                          | 16.7% | 109.0                                         | 10.2% | 46.2                                          | 8.4%  |
| <b>Kit 4</b>   | 25.3                                          | 5.3%  | 119.6                                         | 4.1%  | 49.5                                          | 5.5%  |
| <b>Kit 5</b>   | 25.8                                          | 10.3% | 135.0                                         | 7.7%  | 47.7                                          | 4.3%  |
| <b>Kit 6</b>   | 27.7                                          | 13.6% | 107.0                                         | 4.1%  | 46.7                                          | 6.4%  |
| <b>Kit 7</b>   | 11.4                                          | 13.1% | 104.7                                         | 14.0% | 25.9                                          | 10.9% |
| <b>Kit 8</b>   | 14.0                                          | 11.7% | 123.0                                         | 4.5%  | 35.0                                          | 6.0%  |
| <b>Kit 9</b>   | 17.4                                          | 12.5% | 114.6                                         | 9.1%  | 40.3                                          | 11.9% |
| <b>overall</b> | 21.1                                          | 10.0% | 116.7                                         | 6.8%  | 42.6                                          | 7.6%  |

coefficient of variation (CV%) = (standard deviation)/(mean value)

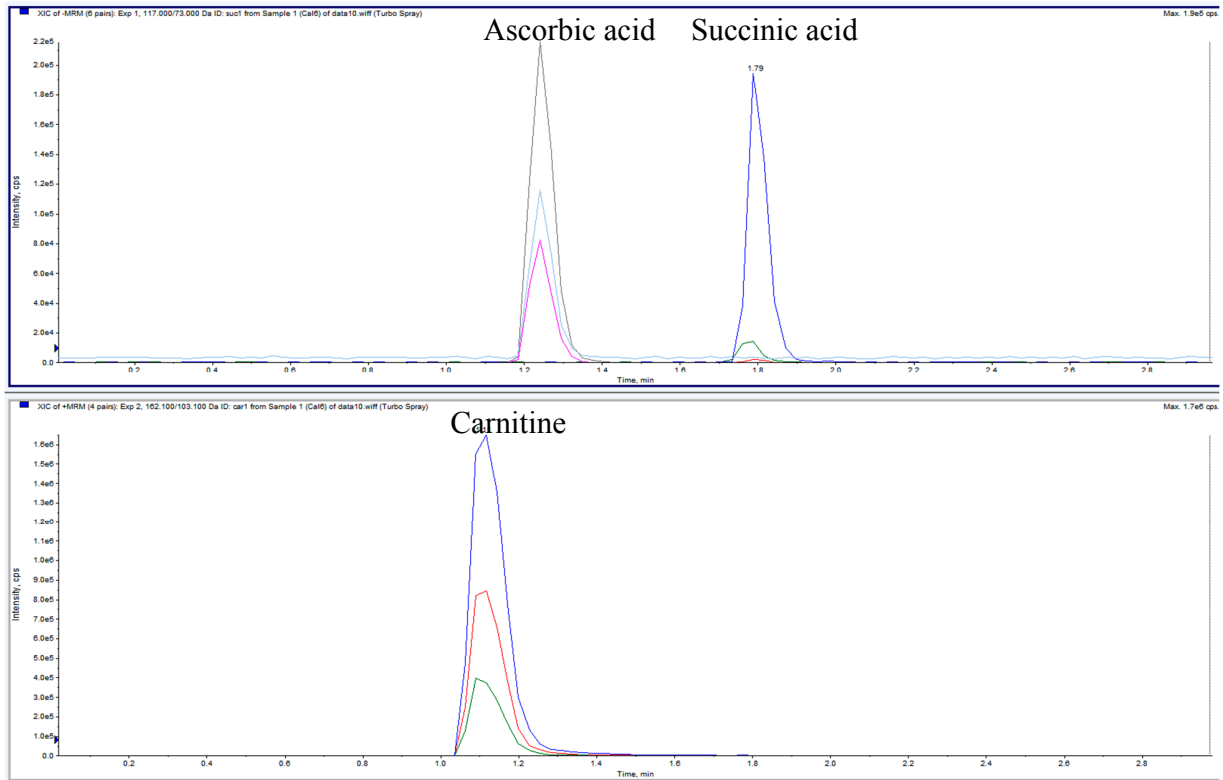

**Figure S1.** A representative LCMS of Calibrant 6.

|   | 1     | 2      | 3       | 4       | 5       | 6       | 7       | 8       | 9       | 10      | 11      | 12      |
|---|-------|--------|---------|---------|---------|---------|---------|---------|---------|---------|---------|---------|
| A | Blank | Cal7   | Urine6  | Urine14 | Urine21 | Urine29 | Urine36 | Urine44 | Urine51 | Urine59 | Urine66 | Urine74 |
| B | ISTD  | Cal8   | Urine7  | Urine15 | Urine22 | Urine30 | Urine37 | Urine45 | Urine52 | Urine60 | Urine67 | Urine75 |
| C | Cal1  | Urine1 | Urine8  | Urine16 | Urine23 | Urine31 | Urine38 | Urine46 | Urine53 | Urine61 | Urine68 | Urine76 |
| D | Cal2  | Urine2 | Urine9  | Urine17 | Urine24 | Urine32 | Urine39 | Urine47 | Urine54 | Urine62 | Urine69 | Urine77 |
| E | Cal3  | Urine3 | Urine10 | Urine18 | Urine25 | Urine33 | Urine40 | Urine48 | Urine55 | Urine63 | Urine70 | Urine78 |
| F | Cal4  | Urine4 | Urine11 | Urine19 | Urine26 | Urine34 | Urine41 | Urine49 | Urine56 | Urine64 | Urine71 | Urine79 |
| G | Cal5  | Urine5 | Urine12 | Urine20 | Urine27 | Urine35 | Urine42 | Urine50 | Urine57 | Urine65 | Urine72 | Urine80 |
| H | Cal6  | QC     | Urine13 | QC      | Urine28 | QC      | Urine43 | QC      | Urine58 | QC      | Urine73 | QC      |

**Figure S2.** A representative plate map. LCMS sequence runs vertically.

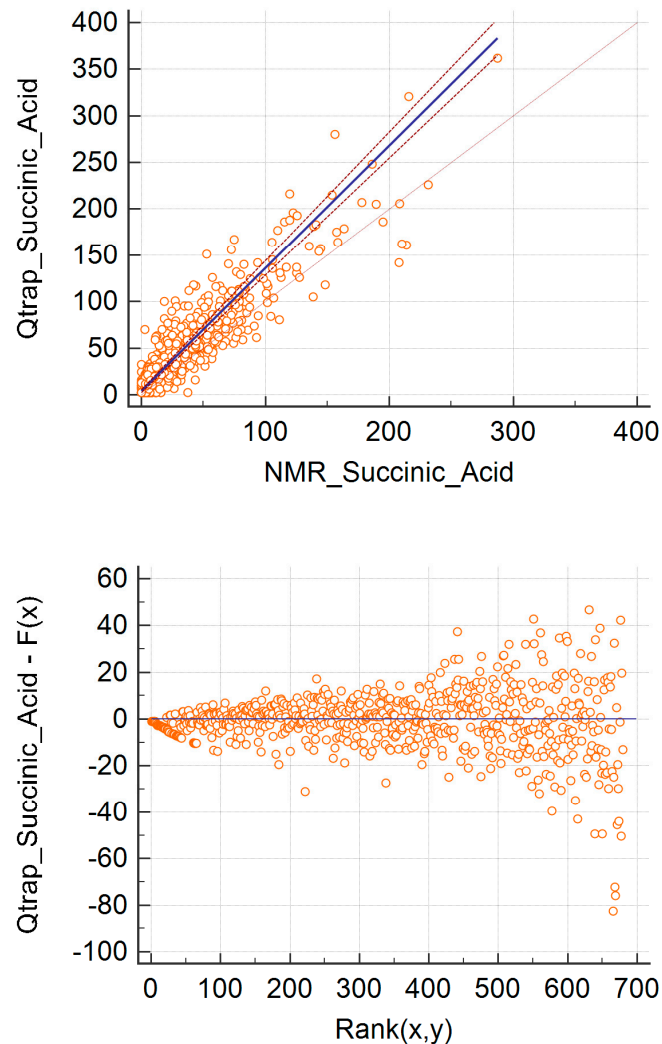

**Figure S3.** Passing and Bablok regression analyses of MS-quantified on NMR-quantified data for Succinic acid, N = 685; concentration range 0-362  $\mu\text{mol/L}$ ; Pearson correlation coefficient  $r = 0.862$ ,  $P < 0.0001$ . **(A)** Scatter diagram with regression line and confidence bands for regression line. Identity line is dashed. Regression line equation:  $y = 4.17 + 1.32x$ ; 95% CI for intercept 2.72 to 5.33 and for slope 1.26 to 1.38 indicated small constant and small proportional difference. Cusum test for linearity indicates significant deviation from linearity ( $P < 0.01$ ). **(B)** Residual plot presents distribution of difference around fitted regression line.

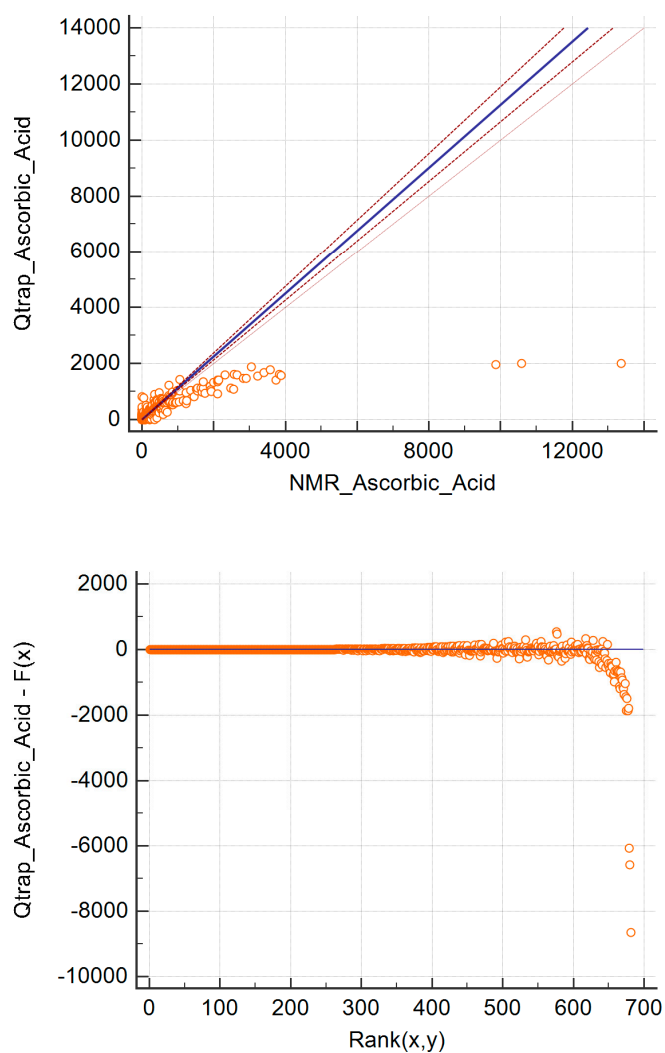

**Figure S4.** Passing and Bablok regression analyses of MS-quantified on NMR-quantified data for Ascorbic acid, N = 685; concentration range 0-13368  $\mu\text{mol/L}$ ; Pearson correlation coefficient  $r = 0.800$ ,  $P < 0.0001$ . (A) Scatter diagram with regression line and confidence bands for regression line. Identity line is dashed. Regression line equation:  $y = 2.50 + 1.12 x$ ; 95% CI for intercept 2.50 to 2.50 and for slope 1.06 to 1.19 indicated small constant and small proportional difference. Cusum test for linearity indicates significant deviation from linearity ( $P < 0.01$ ). (B) Residual plot presents distribution of difference around fitted regression line.

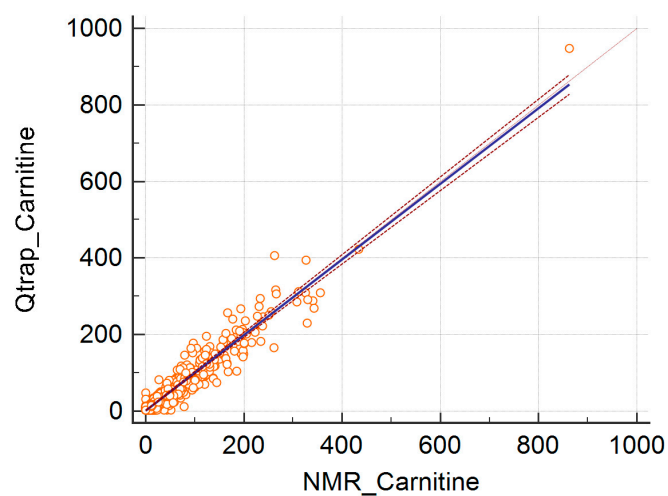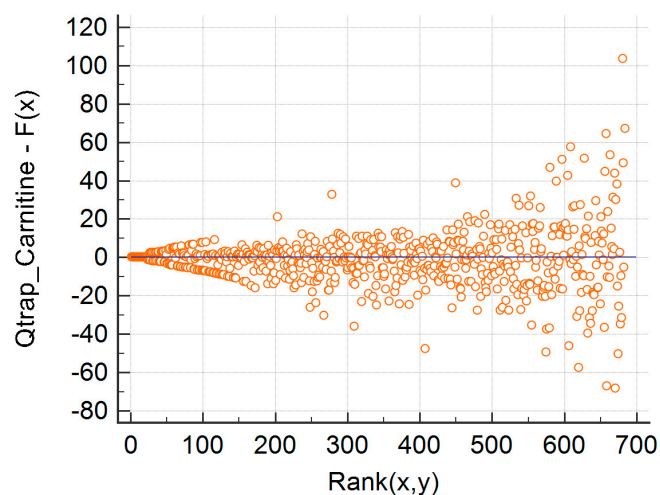

**Figure S5.** Passing and Bablok regression analyses of MS-quantified on NMR-quantified data for Carnitine, N = 685; concentration range 0-948  $\mu\text{mol/L}$ ; Pearson correlation coefficient  $r = 0.921$ ,  $P < 0.0001$ . (A) Scatter diagram with regression line and confidence bands for regression line. Identity line is dashed. Regression line equation:  $y = 1.73 + 0.99x$ ; 95% CI for intercept 0.77 to 2.50 and for slope 0.96 to 1.02 indicated small constant and small proportional difference. Cusum test for linearity indicates significant deviation from linearity ( $P=0.04$ ). (B) Residual plot presents distribution of difference around fitted regression line.
